# Supplementary material for: A photoproduct of DXCF cyanobacteriochromes without reversible Cys ligation is destabilized by rotating ring twist of the chromophore
Source: Royal Society of Chemistry journal article supplement (doi:10.1039/d0pp00208a), 2020-07-23
Supplement: d0pp00208a1.pdf [file d0pp00208a1.pdf]

Supplementary Data File: Multiple sequence alignment of the diverse cyanobacteriochromes

$\beta$ -sheet Phe

AM1\_1499g1 DTTTIFQIAVDKVVQTLQVDRVAIFQFDSATDYKQGVFVAEKVIPIIYSSAVA-----  
AM1\_6305g1 ETQTIFETSVQRVLELIKANRVAIFKLD SATNYTTGCFVAEKVVPPTSALA-----  
FdDpxAg DLETIFQATATEVRQLLLADRVMGFRFYPD SGWDDGEFVSEDVDPAFPSAMA-----  
NpR5113g1 DLETIFQTTATEVRLLLLNADRVAVFQFDL-EKDWEGEFVSENVAPGWT SALK-----  
NpR1597g1 DIETIFKITVTEVRQLLKTDRVGVFRLYP-DLAWEGEFIYEDVATEWDSALA-----  
NpR5113g3 DLDTIFQTTVTEARKMLQADRVAVFRFDP-QKDWEGEFISEDVVPECNSVIA-----  
TeSesB ELSTILETTVKDVRELLGCDRVL IYRFLD---DWRGIMDVEAVVPPWLSALG-----  
NpF1883g2 NEEDVLKTTVEEVRKVLSTDRVMVYTFNA---NWSGTVIAESVPIPGYPKVL R-----  
NpF1883g3 NEEDVLKTTVEEVRKVLSTDRVMIYSFNA---NWSGTVIAESVVLTYPKVL R-----  
NpF1883g4 KEEDVLKTTVEEVRKALSTDRVLVYSFYA---NWFGI IIAESVVPGYPKVL R-----  
AM1\_0048g1 SEEDLLKTTVAEVRQILQTD RVTIFALNN---NGEGTFVAESVAPGYPKLQW-----  
AM1\_0048g2 HTEEILTNAVQESRKVLRADRVIVYSFDE---NWQGTVA AEAVQPGISKMVW-----  
TePixJg DRQAI FETLVAKGRELLACDRVIVYAFDD---NYVGTVVAESVAEGWPQARD-----  
Cce\_4193g2 NTEEV MQIAVEHMRRALKTDRVLIYTFDE---QWMGTIVAEDVANEYPKALN-----  
SyPixJg2 NSEQVFDIAAQEIRLALKADRVIYRFDA---TWAGTVIVESVAEGYPKALG-----  
NpR1597g2 DLESIFRTSTVELRQLLNADRVAIYRFNP---DWSGEFVFESVAEGWISLIDEQLRPELSENV S  
NpF2164g3 DLRTLFRATATQELRRFLKCDRVVYQFHP---DWSGEVIAESVGAGWSSLVEMQE QDGILKTGLI  
Mbr3854g4 NLDTI FDTTTEVRLLKTD RVCVYQFAE---DWSGSFIAESVGATWAPLVQRQQQIPALRDNVS  
AnPixJg2 NIDKIFQTTTQEI RQLLKCDRVAVYRFNP---DWSGEFVAESVSGWVKLVGPDIK-----  
NpR6012g4 DVEEIFKTTTQEV RQLLRCDRVAVYRFNP---NWTGEFVAESVAHTWVKLVGPDIK-----  
Slr1393g3 ELQNI FRATSDEVRHLLS CDRVLVYRFNP---DWSGEFIHESVAQMWEPLKDLQNNF-----  
AM1\_C0023g2 DIEDIFGATTQDVRESLECDRVVIYQFWP---DWSGEFLVESTAPGLIPLSELDVP-----  
AM1\_1557g2 DIQDI FRATTHDVRESL GCDRVVYKFFP---DWSGEFLVEATAPNILPLSELEVP-----  
AM1\_6305g2 DIKDIFIATTEKVRASLECDRVVYHFLP---DWSGEFMFESSDTSFPPLVTANST-----

Insert Cys

2nd Cys

1st Cys

AM1\_1499g1 -----ARVQDDSFGENYATKYQLGRVF-AVADVYDAGLSDC<sup>CH</sup>IQ  
AM1\_6305g1 -----ANVRDDCFGHNYANKYQQGQVF-AVADIYAENLSDC<sup>CH</sup>VR  
FdDpxAg -----QRIHDHCFGEQFAVQYQQGRVQ-AVADIYNCGLSDC<sup>CH</sup>IQ  
NpR5113g1 -----VKVYDHCFGEQFASSYQQGRVQ-AVADIYNAGLSDC<sup>CH</sup>AA  
NpR1597g1 -----AKLCDHCFSEEFASLYQQGRIR-AIADIYQVNASDC<sup>CH</sup>IQ  
NpR5113g3 -----EKIYDYCFGENFASLYAQGRVN-AIADIYQAKFPGC<sup>CH</sup>IQ  
TeSesB -----DVVGDSCFTEQYVEAYKRGRIH-VVNSLEKASVAPC<sup>CH</sup>YRD  
NpF1883g2 -----SEIQDPFCGQGYVEKYQSGRVA-TTNNIYQAGLAD<sup>CH</sup>IS  
NpF1883g3 -----AEIEDPCF GQGYVKEYQSGRVL-AINNIYEVGLAD<sup>CH</sup>IN  
NpF1883g4 -----SKIHDSCFTQGYIEKYQSGRVV-AINNIYESGLAD<sup>CH</sup>IK  
AM1\_0048g1 -----STLHDPCFNEG YQEYRQGRVS-AIDNIYNSGLND<sup>CH</sup>IG  
AM1\_0048g2 -----AEISDPCFANKYVEQYRRGRVQ-AINNVDAGLTE<sup>CH</sup>VQ  
TePixJg -----QVIEDPCF REHWVEAYRQGRIQ-ATTDIFKAGLTE<sup>CH</sup>LN  
Cce\_4193g2 -----AEIMDPCFATK FVDRYLNGRVQ-ATADIHNAGLTE<sup>CH</sup>LN  
SyPixJg2 -----ATIADPCF ADSYVEKYRSGRIQ-ATRDIYNAGLTP<sup>CH</sup>IG  
NpR1597g2 ---ECSAKDLAK-----PPVADTYLQDTEGGSFSSCEVYRICNDIYNSGFSDC<sup>CH</sup>YIK  
NpF2164g3 SSERCNIKDYGS-----PVKADADTYLKETQGGMYAKGTRFRKVNDISAAGFSSC<sup>CH</sup>YLE  
Mbr3854g4 ---QCDNMTSLIERQQSGQLAPQASGPASRD<sup>CH</sup>TYLQETEGGRFQTEQAF-SVEDIYQAGFSTC<sup>CH</sup>YLE  
AnPixJg2 -----TVWEDTHLQETQGGRYRHQESF-VVNDIYEAGHFS<sup>CH</sup>LE  
NpR6012g4 -----TVWEDTHLQETQGGRYAQGENF-VVNDIYQVGHSP<sup>CH</sup>IE  
Slr1393g3 -----PLWQD<sup>CH</sup>TYLQENEGGRYRNHESL-AVGDVETAGFTD<sup>CH</sup>LD  
AM1\_C0023g2 -----MTWQD<sup>CH</sup>TYLQENQGGKFKDNAPT-VVADIYQQSYTD<sup>CH</sup>LE  
AM1\_1557g2 -----MVWQD<sup>CH</sup>TYLQENQGGKYRDNATT-VVADIYQESYRD<sup>CH</sup>LE  
AM1\_6305g2 -----TNWED<sup>CH</sup>TYLQETQGGHYRHQATT-VVADIYEQGYTD<sup>CH</sup>LA

**$\alpha$ -helix Phe**

AM1\_1499g1 IYER**FQ**VRATLVVPLLQGEK**LWGLLC**IHQCSRPRAWKSAEIEF**IKKL**ADQLSVALKQAELHEQAL  
AM1\_6305g1 I**LERFQ**VRANLVVPLLQGEK**LWGLLC**IHQCSGPRAWQPYETQFIQE**VADHL**SEALRQAERLEETQ  
FdDp $\times$ Ag V**LAQF**HIKANLVVPLLQGN**NLWGLLC**CVHQRTSRTWHNTEIEFATQIANH**LAVALQ**HAELLADVQ  
NpR5113g1 I**LSKFQ**VKANLVVPLSRQ**KELWGLLC**IHQCSEARNWKESEIEFIRQ**IADHLT**VAIQQAKHLHEVQ  
NpR1597g1 I**LERFQ**VRANITAP**LIKGNLWGLLC**IHQCSSSRQWEASEIEFVQ**LIAEHLG**VALQQADYLEQVK  
NpR5113g3 I**LEKFQ**VRANLVAP**LLKKGELWGLLC**IHQCTTFRHWQ**PSEIEFTS**QIAEQ**LGVALKQ**DSY**LKQVQ**  
TeSesB **LLAHYQ**VKANLVVPIV**VEGRLWGLLC**ICHQCAHPR**NWQDSEIE**ELIKQISTQLAIAI**LQAELYQ**KAQ  
NpF1883g2 **LLESF**GVKANLVAP**ILKDEQLFGLL**IAHQCSRPRD**WQPEIDL**FAQIAIQ**IGFALD**HARLLQRIE  
NpF1883g3 **LLESF**GVKANLVAP**ILKDEQLFGLL**IAHQCSRPRD**WKQSEIDL**FAQIAMQ**VGFALD**HARLLQRIE  
NpF1883g4 **LLESF**AVKANLVAP**IIKDDQLFGLL**IAHQCSGPRD**WQPEIDL**FTQIAMQ**VGF**FTLDYARLLQAYQ  
AM1\_0048g1 **LLERF**AVKANIVAP**ILQENENLYGLL**IAHQCARPRE**WNQSEIGL**FKQLALQ**VGYALD**RRARVMSHLD  
AM1\_0048g2 Q**LEKYG**VQANLVVPI**LVGEYLFGLL**IAHQCSGPRI**WQSSEIDL**FTQIGV**QLGHALEQ**ANVLTQTE  
TePixJg Q**LRPLK**VRANLVVPM**VIDDQLFGLL**IAHQCEPRQ**WQEIEIDQ**FSELASTG**SLVLERL**HFL**EQT**I  
Cce\_4193g2 **E**LKPF****KVRANLVAP**IIIRKGLLGLY**IAHECSGPR**NWNASEIS**FFSQVAAQ**IGFALER**ADLLEQ**QK**  
SyPixJg2 Q**LKPF**EVKANLVAP**INIKGNLLGLL**IAHQCSGPRD**WHQNEIDL**FGQ**LTVQVGL**ALERSD**LLAQK**  
NpR1597g2 I**LEIYQ**ARAYV**IIAIYHGQ**KLWGLLAVYENAR**TRDWQKDE**VYLLTQ**VGTQLG**VALQQAE**FIQQM**  
NpF2164g3 **SLEK**FQ****AKAYIIVPV**FRAGNLWGLL**AA**YQNSEV**RQWTEEEAGALLQ**IAEPLS**IALQQAE**YIEQLR**  
Mbr3854g4 **VLEQY**QCRA**YAI**VPI**FKGPQLWGLL**AA**YQNN**GPRD**WENE**EV**TLLRQ**IGT**QLGVA**IQQSEY**LQQLQ**  
AnPixJg2 I**LEQ**FE****IKAYIIVPV**FAAEKLWGLL**AA**YQNSG**TREW**VEWESS**F**LTVGLQ**FGIAIS**HAEY**LE**QTR**  
NpR6012g4 I**LEQ**FE****VKAYV**IVPVFAGEQLWGLL**AA**YQNSG**TRD**WDESE**V**TLLAR**IGN**QLGLAL**QQTEY**LQVQ**  
Slr1393g3 **N**LRRE****FEIRAF**LTVPVFVGEQLWGLL**GAYQNGAP**RHWQAREI**HLLH**QIANQL**GVAVY**QAQLL**AR**FQ**  
AM1\_C0023g2 I**LEW**FD****IRAY**MVVPVFIGKTLWGLL**AA**YQLNH**PRQ**WQKVELY**LLKQAGA**QLGVAL**QQAE**LLNQLR**  
AM1\_1557g2 I**LEW**YK****IRAY**MVVPVFIGETLWGLL**AA**YQLNV**PRQ**WHKVELY**LLKQAGA**QLGVAL**QQAE**LLKQVR**  
AM1\_6305g2 **MLER**FH****IRAF**MVVPVFG**EKLWGL**LATYQHTQIR**HWQD**LELKL**LK**VGAQLG**VALQQAN**LLKDLR**
